# Supplementary material
Source: PubMed Central journal article supplement (PMC8185104)
Supplement: 41418_2021_795_MOESM1_ESM.pdf [file 41418_2021_795_MOESM1_ESM.pdf]

Please complete the table below to indicate the contributions of all named authors to the figures.

Figure 1:

Yufang Shi, Qing Li, Liangyu Lin

Figure 2:

Figure 3:

Figure 4:

Figure 5:

Figure 6:

Signed for and on behalf of the Author(s):

Print Name:

Date:

Yufang Shi

2021.4.19
